# Supplementary material
Source: PubMed Central journal article supplement (PMC8362840)
Supplement: NIHMS1728081-supplement-Supp_Table_1_NIHMS_ID_1728081.pdf [file NIHMS1728081-supplement-Supp_Table_1_NIHMS_ID_1728081.pdf]

Supplemental Table

**Table: Adjusted association of enrollment in public assistance programs and technology**

|                                       | Enrollment in Early Intervention |            |         | Enrollment in food assistance programs (WIC/SNAP)** |            |         | Enrollment in SSI or TANF** |             |         |
|---------------------------------------|----------------------------------|------------|---------|-----------------------------------------------------|------------|---------|-----------------------------|-------------|---------|
|                                       | OR                               | 95% CI     | P value | OR                                                  | 95% CI     | P value | OR                          | 95% CI      | P value |
| Use of internet                       | 2.01                             | 0.85, 4.78 | 0.11    | 0.39                                                | 0.13, 1.28 | 0.11    | 1.16                        | 0.43, 3.05  | 0.76    |
| Use of email                          | 3.08                             | 1.31, 7.49 | 0.01    | 0.26                                                | 0.05, 1.19 | 0.08    | 1.97                        | 0.67, 5.75  | 0.22    |
| Use of mobile technology (smartphone) | 3.21                             | 1.23, 8.36 | 0.02    | 0.51                                                | 0.12, 2.19 | 0.36    | 3.35                        | 1.23, 9.23  | 0.02    |
| Use of texting                        | 1.75                             | 0.48, 6.4  | 0.39    | 0.94                                                | 0.15, 5.93 | 0.94    | 4.73                        | 0.53, 42.42 | 0.17    |

\*adjusted for race, maternal education, chronologic age in months, post discharge diagnosis, use of medical equipment

\*\*also adjusted for enrollment in early intervention programs
